1  
2  
3  
4  
5  
6  
7  
8  
9  
10  
11  
12  
13  
14  
15  
16  
17  
18  
19  
20  
21  
22

**Research productivity and collaboration of the NIH-funded HIV Vaccine Trials  
Network: a bibliometric analysis**

<sup>1</sup>Jonathan Nye, <sup>2</sup>M.Patricia D’Souza, <sup>2</sup>Dale Hu, <sup>1</sup>Dolan Ghosh\*

<sup>1</sup>Office of the Director, NIAID, NIH, Bethesda, Maryland, USA.

<sup>2</sup>Division of AIDS, NIAID, NIH, Bethesda, Maryland, USA.

\*Corresponding author

E-mail: [ghoshd1@niaid.nih.gov](mailto:ghoshd1@niaid.nih.gov)

Word count: 3900

23        **ABSTRACT**

24        **Objectives:** To assess the scientific productivity and impact of the HIV Vaccine Trials  
25        Network (HVTN) over the last two decades and to examine how research collaboration  
26        has evolved over this time in the HIV vaccine field.

27  
28        **Design:** This section does not apply since this is a bibliometric study.

29  
30        **Methods:** A systematic bibliometric analysis was conducted to identify all HIV vaccine  
31        and HVTN associated publications from 1999-2019. All publications were sourced from  
32        the NLM Pubmed database and funding information was obtained from the SPIRES and  
33        iSearch databases. Both the InCites and iCite databases were utilized for impact metrics.  
34        Finally, HVTN clinical trials were obtained from [clinicaltrials.gov](http://clinicaltrials.gov). Multiple field  
35        normalized citation metrics, such as the relative citation ratio (RCR) and number of  
36        publications in the top 1% and 10% within their respective field, were used to gauge  
37        scientific impact of publications. Network analyses were used to examine collaboration  
38        among the most prolific researchers in the HIV vaccine research.

39  
40        **Setting:** This section does not apply since this is a bibliometric study.

41  
42        **Participants:** This section does not apply since this is a bibliometric study.

43  
44        **Intervention:** This section does not apply since this is a bibliometric study.

45       **Results:** 79 clinical trials were funded by the HVTN from 1999 to 2019. These were  
46       carried out via a network of trial sites in 23 countries and 94 cities around the world. In  
47       total, 465 publications (89.5% original research articles, 7.3% reviews, and 3.2% other)  
48       acknowledged funding from the HVTN. Impact analyses using multiple field normalized  
49       metrics revealed that HVTN publications are highly cited with a mean RCR of 1.8. 10,481  
50       HIV vaccine related publications were used to analyze collaboration in this field.  
51       Compared to the field as a whole, publications attributed to the HVTN had significantly  
52       more authors per publication (p-value < 0.001) and our network analysis found that  
53       HVTN-associated authors also had a higher degree (p-value < 0.01).

54  
55       **Conclusions:** Bibliometric analysis of the last two decades of HIV vaccine research by the  
56       HVTN revealed that in addition to conducting a large number of clinical trials worldwide,  
57       the network produced high impact publications and was associated with increased  
58       collaboration among researchers.

59  
60       **ARTICLE SUMMARY**

61       **Strengths and limitations of this study**

- 62
  - 63               • To the best of our knowledge, this is the only study that has provided a  
64               systematic bibliometric analysis of the HVTN since its inception.
  - 65               • Studies like this can illustrate overall outcomes of large clinical network  
              programs.

- 66           • Advanced field normalized metrics were used to provide the most accurate  
67           measures of productivity, impact, and collaboration.
- 68           • Identification of HVTN publications using funding acknowledgements can lead to  
69           an underestimate of the number research articles since not all research articles  
70           include grant funding information.
- 71           • Variations in a single author's name across publications can make name  
72           disambiguation difficult when performing network analyses.

73

74           **Keywords:** Bibliometrics; Outcomes; HIV vaccine; HIV

75

## 76           **INTRODUCTION**

77           Human immunodeficiency virus (HIV) remains a public health concern with an estimated  
78           global prevalence of 36.9 million HIV-infected persons worldwide and 1.8 million new  
79           infections per year <sup>1</sup>. Remarkable progress in treating HIV/AIDS has been made after  
80           almost four decades of active research since the first cases of AIDS were reported.  
81           Prevention and treatment have dramatically improved as a result of increased testing  
82           and treatment with anti-retroviral therapy (ART) <sup>2</sup>. However, there are still no licensed  
83           vaccines to prevent HIV infection, even though a vaccine will likely be essential to  
84           achieve a long-lasting end to the global pandemic <sup>3</sup>.

85

86           Several HIV vaccine efficacy trials were conducted between 2004 and 2009. One of  
87           these trials, known as RV144, resulted in the first vaccine regimen to exhibit a protective

88 effect, suggesting that an effective vaccine might be achievable <sup>4</sup>. Since then,  
89 researchers around the world have worked to build on these findings in hopes of  
90 developing a more effective and durable immune response capable of preventing HIV  
91 infection. The National Institutes of Health (NIH) funds the large majority of research on  
92 HIV/AIDS vaccines in the world. Indeed in 2018, 85% of funding for HIV vaccine research  
93 worldwide was contributed by only two major funders, the NIH and the Bill and Melinda  
94 Gates Foundation <sup>5</sup>. Within the NIH, one institute in particular, the National Institute of  
95 Allergy and Infectious Diseases (NIAID), through its Division of AIDS (DAIDS) has led the  
96 effort to develop a safe and effective vaccine and has supported a robust body of HIV  
97 vaccine-related research from preclinical and translational research to clinical trials. In  
98 addition, it has established and supported several large networks dedicated to  
99 conducting HIV/AIDS clinical trials both within the United States and globally.

100

101 Since it was established in 1999, the NIAID supported HIV Vaccine Trials Network has  
102 conducted the majority of clinical trials of preventive HIV vaccines worldwide <sup>6</sup>. The  
103 HVTN is comprised of an international group of scientists, educators, and community  
104 members whose mission is to support the development of a safe and effective vaccine  
105 for prevention of HIV infections. It conducts all phases of clinical trials, from testing  
106 safety and immunogenicity of vaccine candidates to evaluating vaccine efficacy. It is  
107 made up of three parts: the Laboratory Center, the Statistical and Data Management  
108 Center, and the Leadership and Operations Center <sup>7</sup>. All three of these work closely with  
109 the clinical research and trial sites. As the federal government funder of non-

110 governmental networks like the HVTN, DAIDS plays a major collaborative role as not  
111 only the funder but in scientific and protocol development, trial and safety monitoring,  
112 laboratory and other support, in addition to serving as the regulatory sponsor. The  
113 HVTN's trial sites are located at research institutions around the world while the vaccine  
114 products come from various developers, both for profit and academic investigators. This  
115 structure allows it to streamline HIV vaccine testing and to reach populations severely  
116 impacted by the HIV/AIDS epidemic in both the U.S. and abroad <sup>8</sup>.

117  
118 Although the HVTN is one of the largest and longest lasting HIV research programs, its  
119 productivity and impact has not been well-documented in the literature. While previous  
120 studies have examined research outputs <sup>9</sup>, expansion of subject areas <sup>10</sup>, collaborations  
121 <sup>11</sup>, and the geographic distribution of HIV research <sup>12</sup>, they have been relatively limited  
122 in scope in terms of geographic region or time <sup>13-16</sup>. Moreover, despite the growing  
123 importance of scientific collaborations <sup>17</sup>, studies examining collaborations within HIV  
124 clinical trials networks have been limited to only a few years <sup>11</sup>. Previous work has  
125 outlined the scientific achievements over the first decade of the HVTN however a  
126 bibliometric analysis of the program has yet to be done <sup>7</sup>.

127  
128 Our study seeks to build on previous work by providing a comprehensive bibliometric  
129 analysis of the HVTN from 1999-2019, including an overview of the international  
130 network of clinical trial sites utilized by the program and an in-depth examination  
131 research outputs such as clinical trials and number of publications in combination with

132 advanced field normalized metrics to assess the impact of this work. We also show how  
133 collaboration has evolved in the HIV vaccine field as a whole as well as among HVTN  
134 investigators. Together, this work provides an overview of the productivity and impact  
135 of the HVTN since it was first established 20 years ago.

136

137

## 138 **METHODS**

139 Both publicly available and internal NIH databases were used to gather data for the  
140 study. All analyses and visualization were carried out using the R programming  
141 language.

142

### 143 **HVTN clinical trials**

144 A comprehensive list of clinical trials that were attributed to the HVTN was obtained  
145 from the ClinicalTrials.gov database through 2019 by searching for trials with keyword  
146 “HVTN”. From this list we kept only trials with an HVTN identifier listed in the Acronym  
147 or Other Study ID. Finally, this list of trials was manually curated by program staff. This  
148 resulted in a final list of 79 clinical trials.

149

### 150 **Geographic distribution**

151 Data on HIV prevalence among people ages 15-49 in 2017 was obtained from the World  
152 Health Organization. HVTN clinical trial sites were retrieved from ClinicalTrials.gov. Out  
153 of the 79 total clinical trials 77 had location information associated with them. Counties

154 and states comprising >50% of new HIV infections were obtained from the Ending the  
155 HIV Epidemic initiative. Mapping of global clinical trial sites and HIV prevalence was  
156 done using the ggplot2 package.

157

### 158 **HVTN publications**

159 The iSearch platform is a suite of tools available to NIH staff that provides access to a  
160 comprehensive, curated, extensively linked data set of global grants, patents,  
161 publications, clinical trials, and FDA-approved drugs. The iSearch Publications tool  
162 utilizes the NLM PubMed and SPIRES databases. The SPIRES database contains  
163 positively, verifiable mappings between scientific publications and NIH grant numbers  
164 and is available to NIH staff. Using the iSearch Publications tool, we searched for all  
165 publications that acknowledged HVTN grant funding using grant numbers. NIH's publicly  
166 available iCite tool <sup>18</sup> was used to distinguish research articles from derivative or non-  
167 research articles. The iCite article type classification is based on PubMed "Publication  
168 Type" tags. Of the 465 publications citing HVTN support, 416 research articles were  
169 retained for analysis. The other 49 publications were review articles, commentary, or  
170 other non-research articles. The HVTN publications found in the SPIRES system include  
171 only those publications that cite support from NIAID funding. Not all publications  
172 contain such citations.

173

### 174 **HIV vaccine publications and coauthorship network analysis**



175 iSearch was also used to identify a larger set of publications encompassing the HIV  
176 vaccine field, using the following search terms applied to publication titles and  
177 abstracts: (HIV\* AND VACCIN\*), (AIDS AND VACCIN\*), (Antibodies AND Neutralizing AND  
178 (HIV\* OR AIDS)). This resulted in 16,643 publications published between 2000 and 2019.  
179 From this dataset, 12,426 were identified as research articles using the iCite article type  
180 classification described above. In addition, to enrich for articles that were specific to the  
181 HIV vaccine field, we excluded articles where HIV/AIDS was not the primary focus of the  
182 article. Therefore, we removed publications that contained the following keywords or  
183 parts of keywords in the title: tuberculosis, hepatitis, influenza, papilloma, pneumococc,  
184 meningococc, herpes, streptococc, HBV, HCV, or yellow fever. This left us with a final list  
185 of 10,481 HIV vaccine research articles including 281 acknowledging HVTN funding.

186  
187 From the HIV vaccine publication dataset, we created undirected and unweighted  
188 coauthorship networks using the igraph and ggplot2 packages in R. We built two  
189 coauthor networks, one spanning the years 2000-2009 and another from 2010-2019 to  
190 capture how collaboration in the field has changed over time. The network layouts were  
191 generated using the Kamada-Kawai force-directed algorithm<sup>19</sup>. Authors publishing  
192 under a number of different name variations is a challenge in creating coauthor  
193 networks, so to ensure the quality of our results we used a custom script for author  
194 disambiguation. Briefly, it calculates the number of name variations among authors with  
195 the same last name and first initial combination to determine how many possible  
196 variants there are for each combination. Authors were separated into categories of high

197 or low confidence based on this value. Low confidence combinations with many  
198 different names were manually corrected and high confidence combinations having  
199 little or no variation in naming were automatically corrected. For the sake of simplicity  
200 and clarity, only the top 150 most prolific authors in each time period were used in our  
201 networks. This allowed us to see how collaboration among the most prolific  
202 investigators in the HIV vaccine field evolved while avoiding overly dense and crowded  
203 networks. Furthermore, we identified all of the investigators on publications  
204 acknowledging HVTN grant funding and highlighted nodes representing these HVTN  
205 associated investigators and the edges connecting them.

206

207

## 208 **RESULTS**

### 209 **HVTN clinical trials**

210 Of the 79 trials funded by the HVTN through 2019, 61 were Phase I, 6 were Phase  
211 I/Phase II, 10 were Phase II, 1 was Phase II/Phase III, and 1 was a Phase III trial (Fig 1). In  
212 total, over 26,000 participants were enrolled over this time period. The largest portion  
213 coming from the large proof-of-concept and efficacy trials which enrolled 18,658  
214 participants. The smaller Phase I and II trials testing safety and immunogenicity enrolled  
215 7,978 participants.

216

### 217 **Geographic distribution**

218 The global network of all HVTN clinical trial sites up until 2019 and the prevalence of HIV  
219 among people ages 15-49 in 2017 is shown in Figure 2. The HVTN had clinical trial sites  
220 in 23 countries and 94 cities worldwide. Of the 79 trials, 65 had a US component. These  
221 were carried out in 20 different states and 31 cities around the country. Many of these  
222 clinical trials took place in communities that have been most affected by the HIV  
223 epidemic. Recently, 48 counties and 7 states have been identified that account for >50%  
224 of all new HIV diagnoses in the United States between 2016 and 2017. State and county  
225 level data indicate that, the HVTN has had trials in 21 of these counties and 2 states.

226

### 227 **HVTN productivity and impact**

228 To get a better understanding of the impact and productivity of the HVTN we identified  
229 all publications that acknowledged grant support from 1999-2019 (Fig 3). In total there  
230 were 465 publications (89.5% original research articles, 7.3% reviews, and 3.2% other).  
231 Out of the entire set of publications we decided to focus specifically on the 416 original  
232 research articles when assessing the performance and impact of the HVTN since these  
233 are the best indicators of the network's scientific contributions. Analysis of the number  
234 of research articles per year revealed a dramatic increase in publications per year  
235 beginning in 2011. After reaching a peak of 50 publications in 2014 and again in 2016  
236 the number of publications declined to 32 research articles in 2018. However, this trend  
237 was reversed in 2019 when 42 articles were produced by the network.

238

239 In addition to the productivity, we wanted to gauge the performance and impact of  
240 these publications using citation-based metrics including multiple field normalized  
241 indicators (Table 1). We found that HVTN research articles had been cited a total of  
242 12,521 times with a median number of citations per paper of 10 and a mean of 30.1  
243 (range 0-1088). In addition, 99.1% were cited at least once after 5 years compared to  
244 88% of all articles in iSearch database. In order to determine how these publications  
245 performed relative to their field of study we used two separate metrics. The first is the  
246 relative citation ratio (RCR) which uses a novel method based on the paper's co-citation  
247 network to provide a field normalized metric<sup>18</sup>. We found that HVTN publications had a  
248 mean RCR of 1.8 (range 0-47.4) meaning that on average they were cited 1.8 times more  
249 than expected. In addition, we used the InCites database which organizes research  
250 articles by publication year and subject area based on journal category to analyze the  
251 percentile rank of 399 HVTN publications found in their collection<sup>20</sup>. We found that  
252 after normalizing for time and subject area 22.1% were in the top 10% most cited  
253 papers indicating that these publications were represented more than twice as much as  
254 expected in this highly cited category within their respective field. Moreover, we found  
255 that 5% of these publications were in the top 1% most cited papers, meaning that HVTN  
256 supported papers were represented 5 times as much compared to other papers in their  
257 field and is better than all NIH supported papers that made the top 1% cited tier<sup>21</sup>.

258 **Table 1. Summary of bibliometric indicators.**

| <b>Bibliometric Indicator</b>        | <b>Value</b> |
|--------------------------------------|--------------|
| Number of original research articles | 416          |
| Number of citations                  | 12,521       |
| Average citations per paper          | 30.1         |
| Median citations per paper           | 10.0         |
| Number of journals                   | 117          |

259 To compare the HVTN's productivity with the HIV vaccine field we utilized a keyword  
260 search to identify 10,481 unique publications that represent the HIV vaccine field from  
261 2000-2019. To analyze how the field changed over time we looked at two different time  
262 periods, one spanning the years 2000-2009 and another from 2010-2019. Our analysis  
263 revealed that productivity of the HVTN increased from 44 publications in time period 1  
264 to 237 publications in time period 2. During this timeframe the HIV vaccine field grew  
265 with the total number of publications increasing from 4,471 in the earlier time period to  
266 6,010. HVTN publications had a 5.4-fold increase from the first time period to the next  
267 while the HIV vaccine field grew by 1.3-fold and the iSearch index grew by 1.7-fold  
268 during the same time periods. In comparison, HVTN associated authors had a mean  
269 number of publications of 28.9 from 2000-2009 and 60.4 from 2010-2019. On average,  
270 the authors on papers acknowledging HVTN funding published slightly more often and  
271 showed a greater increase in productivity between the two time periods compared to  
272 the top 150 most prolific authors in the field.

273

274

#### **Collaboration in the HVTN**

275 As a measure of collaboration, we looked at the number of authors per publication  
276 between these two time periods. We found that the mean number of authors on HIV  
277 vaccine publications increased significantly (Welch's two sample t test,  $df = 10,421$ ,  $p$ -  
278 value  $< 0.001$ ) from 7.5 (range 1-52) in the first time period to 9.4 (range 1-61) in the  
279 second time period. Similarly, HVTN publications in this dataset also tended to have  
280 significantly (Welch's two sample t test,  $df = 127.6$ ,  $p$ -value  $< 0.001$ ) more coauthors  
281 with the mean number of authors rising from 8.8 (range 1-21) to 14.4 (range 1-56)  
282 respectively. When we compared number of authors on HVTN publications to non-HVTN  
283 publications we found that HVTN publications had a significantly higher (Welch's two  
284 sample t test,  $df = 244.1$ ,  $p$ -value  $< 0.001$ ) number of authors per paper during the  
285 second time period suggesting that HVTN authors collaborated more compared to  
286 authors in the HIV vaccine field. As an additional measure of collaboration, we created  
287 two coauthor networks one spanning each of the two different time periods (Fig 4).  
288 These networks have been shown to be a very useful tool for the analysis of  
289 collaboration within a field<sup>22 23</sup>. Each node in the network represents an author while a  
290 connection (edge) between these nodes indicates coauthorship. We restricted the  
291 networks to the top 150 most prolific authors in each time period. These authors were  
292 responsible for greater than a third of the publications and were the most connected.  
293 Author names were disambiguated using a script described above and further checked  
294 manually to ensure accuracy. Edges connecting authors on HVTN publications have been  
295 highlighted. Next, we calculated the degree of each investigator which corresponds to  
296 the number of authors that individual has published with and is equal to the number of

297 edges in the network for that person. The network analysis revealed that collaboration  
298 increased over time in the HIV vaccine field with the average degree rising from 19.4  
299 between 2000 and 2009 to 63 in the following years. In addition, we examined HVTN  
300 associated authors and found a similar trend in which the mean degree increased from  
301 27.6 and 66. This was significantly higher than for non-HVTN authors (Welch's two  
302 sample t test,  $p$ -value  $< 0.01$ ), mean of 17.5 from 2000-2009 and mean of 52.1 from  
303 2010-2019. Finally, our analysis revealed that the number of the HVTN associated  
304 investigators represented in the networks more than tripled over these two time  
305 periods, increasing from 28 to 116 individuals.

306

## 307 **DISCUSSION**

308 The development of a safe and effective HIV vaccine is entering a very exciting phase  
309 with four efficacy trials underway, more than any other time in the history of HIV  
310 vaccine development. These developments represent the culmination of many years of  
311 preclinical research and clinical trials, with most of this research funded by NIH making  
312 this a perfect time for assessing the HVTN program. Clinical sites are an essential  
313 component of the network, therefore, it must support a robust global network capable  
314 of handling a large number of clinical trials. Indeed, we find that the HVTN supports  
315 clinical sites in 23 countries and 94 cities worldwide. Many of these countries have been  
316 the hardest hit by the AIDS epidemic including South Africa, Zimbabwe, and Botswana  
317 among others. The global expansion of trial sites has coincided with the shift in HIV  
318 vaccine antigen design. Between 1985 and 2005, over 90% of candidate HIV vaccines

319 were clade B based antigens, while in the last 10 years, >80% of the HVTN portfolio  
320 involves clade C and mosaic envelope antigens<sup>24-26</sup>. Our studies indicate that the HVTN  
321 is furthering its program goals of reaching populations severely impacted by the  
322 HIV/AIDS epidemic in both the U.S. and abroad<sup>8</sup>.

323  
324 In addition to carrying out a large number of vaccine clinical trials, the HVTN in general  
325 has increased productivity over time, publishing more since 2011. This increase in  
326 publications may be due in part to new insights gained from the RV144 trial in which the  
327 first partially effective HIV vaccine was tested. Furthermore, we found that HVTN  
328 publications were high impact as shown by multiple field normalized citation metrics  
329 including RCR and the percentage of publications in the top 1% or 10% in their  
330 respective field of study. Many of these articles summarize the major accomplishments  
331 throughout the life of the network such as the development and analyses of numerous  
332 new vaccine approaches, products, and adjuvants<sup>26-33</sup>. Additionally, our analyses  
333 revealed that HVTN associated PIs more than tripled among the top 150 most prolific PIs  
334 in the field from the first time period to the next.

335  
336 Our analysis of research articles in the HIV vaccine field revealed that collaboration  
337 increased significantly during the assessed time period as indicated by an increase in the  
338 mean number of authors per publication. Moreover, this increase was even higher for  
339 HVTN associated investigators compared to the field. Our coauthor network analysis of  
340 the top 150 most prolific authors showed that collaboration among them also increased



341 substantially from 2000 to 2019 as indicated by the tripling of the average degree. In  
342 addition, we found that HVTN associated investigators had a significantly higher degree  
343 compared to non-HVTN investigators. This difference was likely driven in part by  
344 increased publication frequency but also by larger team sizes. Thus, the HVTN's unique  
345 structure may create an environment that fosters collaborations to stimulate  
346 interdisciplinary clinical research.

347  
348 Scientific research collaboration is critically important in a complex and multidisciplinary  
349 field such as HIV vaccine development as it allows improved sharing of knowledge and  
350 expertise as well as the pooling of resources and data. Increasingly sophisticated  
351 technologies and the massive amounts of data that is being generated means that more  
352 and more researchers must specialize and focus their resources. In turn, increasing  
353 specialization of research scientists means that successful research requires increasingly  
354 larger, multidisciplinary collaborations and sharing of knowledge. This trend was  
355 documented across many disciplines including science and engineering, but it is  
356 certainly true for as specialized a field as HIV vaccine development<sup>17</sup>. Therefore, HVTN's  
357 focus on data sharing and collaboration may help researchers to capitalize on the  
358 knowledge gained from its different teams to carry out multidimensional analyses.

359  
360 Beyond the productivity, influence, and impact measured in this study, the NIH values  
361 work that culminates in advances to human health, a process that historically takes  
362 decades. Insights into how to accelerate this process may come from quantitative

363 analysis. Metrics have facilitated quantitation of the diffusion of knowledge from basic  
364 research toward human health studies, by examining the type rather than the count of  
365 citing articles. Insights into how to accelerate this process will probably come from  
366 quantitative analysis<sup>34</sup>. Comprehensive evaluation programs will need to incorporate  
367 these additional metrics that can capture other types of outcomes such as the value of  
368 innovation, clinical outcomes, novel vaccine platforms, research enabling vulnerable  
369 populations, global collaborations, and training the next generation of scientists

370

### 371 **Acknowledgements**

372 We would like to thank Mary Marovich, Ariel Zane, Marie Parker and Jim Onken for  
373 their helpful guidance and feedback.

374

375

### 376 **Author contributions**

377 PD, DH, and DG devised the original idea for the article. JN was responsible for data  
378 collection and analysis. DG and JN participated in the development of methodology. All  
379 authors contributed to drafting and revising the manuscript.

380

### 381 **Funding**

382 This research received no specific grant from any funding agency in the public,  
383 commercial or not-for-profit sectors.

384

385 **Competing interests**

386 The authors declare no competing interests.

387

388 **Data sharing statement**

389 No additional data available.

390

391

392 **REFERENCES**

393

394 1. UNAIDS. Global AIDS update 2019 — Communities at the centre [Available from:

395 <https://www.unaids.org/en/resources/documents/2019/2019-global-AIDS-update>

396 accessed January 17, 2020 2020.

397 2. Cohen MS, Chen YQ, McCauley M, et al. Antiretroviral Therapy for the Prevention of

398 HIV-1 Transmission. *New Engl J Med* 2016;375(9):830-39. doi: 10.1056/NEJMoa1600693

399 3. Fauci AS. An HIV Vaccine Is Essential for Ending the HIV/AIDS Pandemic. *JAMA*

400 2017;318(16):1535-36. doi: 10.1001/jama.2017.13505 [published Online First:

401 2017/10/21]

402 4. Rerks-Ngarm S, Pitisuttithum P, Nitayaphan S, et al. Vaccination with ALVAC and

403 AIDSVAX to prevent HIV-1 infection in Thailand. *N Engl J Med* 2009;361(23):2209-20.

404 doi: 10.1056/NEJMoa0908492 [published Online First: 2009/10/22]

405 5. Bekker LG, Tatoud R, Dabis F, et al. The complex challenges of HIV vaccine

406 development require renewed and expanded global commitment. *Lancet* 2019 doi:

407 10.1016/S0140-6736(19)32682-0 [published Online First: 2019/12/07]

- 408 6. Network HVT. HVTN Mission 2020 [Available from:  
409 <https://www.hvtn.org/en/about/hvtn-mission.html>.
- 410 7. Kublin JG, Morgan CA, Day TA, et al. HIV Vaccine Trials Network: activities and  
411 achievements of the first decade and beyond. *Clin Investig (Lond)* 2012;2(3):245-54. doi:  
412 10.4155/cli.12.8 [published Online First: 2012/12/18]
- 413 8. Health NIO. NIH Guide to Grants and Contracts, Notice RFA AI-05-001, Leadership for  
414 HIV/AIDS Clinical Trials Networks 2017 [Available from:  
415 <https://grants.nih.gov/grants/guide/rfa-files/RFA-AI-05-001.html> accessed January 24,  
416 2020.
- 417 9. Sengupta IN, Kumari L. Bibliometric Analysis of Aids Literature. *Scientometrics*  
418 1991;20(1):297-315. doi: Doi 10.1007/Bf02018160
- 419 10. Bierbaum EG, Brooks TA. The Literature of Acquired-Immundeficiency-Syndrome  
420 (Aids) - Continuing Changes in Publication Patterns and Subject Access. *J Am Soc Inform*  
421 *Sci* 1995;46(7):530-36. doi: Doi 10.1002/(Sici)1097-4571(199508)46:7<530::Aid-  
422 Asi6>3.0.Co;2-C
- 423 11. Rosas SR, Kagan JM, Schouten JT, et al. Evaluating research and impact: a  
424 bibliometric analysis of research by the NIH/NIAID HIV/AIDS clinical trials networks. *PLoS*  
425 *One* 2011;6(3):e17428. doi: 10.1371/journal.pone.0017428 [published Online First:  
426 2011/03/12]
- 427 12. Small H. A Sci-Map Case-Study - Building a Map of Aids Research. *Scientometrics*  
428 1994;30(1):229-41. doi: Doi 10.1007/Bf02017225

- 429 13. Onyancha OB, Ocholla DN. A comparative study of the literature on HIV/AIDS in  
430 Kenya and Uganda: A bibliometric study. *Libr Inform Sci Res* 2004;26(4):434-47. doi:  
431 10.1016/j.lisr.2004.04.005
- 432 14. Patra SK, Chand P. HIV/AIDS research in India: A bibliometric study. *Libr Inform Sci*  
433 *Res* 2007;29(1):124-34. doi: 10.1016/j.lisr.2006.08.010
- 434 15. Uthman OA. Geographical variations and contextual effects on age of initiation of  
435 sexual intercourse among women in Nigeria: a multilevel and spatial analysis. *Int J*  
436 *Health Geogr* 2008;7 doi: Artn 27  
437 10.1186/1476-072x-7-27
- 438 16. Macias-Chapula CA, Mijangos-Nolasco A. Bibliometric analysis of AIDS literature in  
439 Central Africa. *Scientometrics* 2002;54(2):309-17. doi: Doi 10.1023/A:1016074230843
- 440 17. Wuchty S, Jones BF, Uzzi B. The increasing dominance of teams in production of  
441 knowledge. *Science* 2007;316(5827):1036-9. doi: 10.1126/science.1136099 [published  
442 Online First: 2007/04/14]
- 443 18. Hutchins BI, Yuan X, Anderson JM, et al. Relative Citation Ratio (RCR): A New Metric  
444 That Uses Citation Rates to Measure Influence at the Article Level. *PLoS Biol*  
445 2016;14(9):e1002541. doi: 10.1371/journal.pbio.1002541 [published Online First:  
446 2016/09/07]
- 447 19. Kamada T, Kawai S. An Algorithm for Drawing General Undirected Graphs. *Inform*  
448 *Process Lett* 1989;31(1):7-15. doi: Doi 10.1016/0020-0190(89)90102-6
- 449 20. Analytics C. InCites: An objective analysis of people, programs and peers 2020  
450 [Available from: <https://clarivate.com/webofsciencegroup/solutions/incites/>.

- 451 21. Lauer M. Publication Impact of NIH-funded Research – A First Look 2016 [Available  
452 from: <https://nexus.od.nih.gov/all/2016/03/02/nih-publication-impact-a-first-look/>  
453 accessed January 28, 2020.
- 454 22. Vanni T, Mesa-Frias M, Sanchez-Garcia R, et al. International scientific collaboration  
455 in HIV and HPV: a network analysis. *PLoS One* 2014;9(3):e93376. doi:  
456 10.1371/journal.pone.0093376 [published Online First: 2014/04/01]
- 457 23. Morel CM, Serruya SJ, Penna GO, et al. Co-authorship network analysis: a powerful  
458 tool for strategic planning of research, development and capacity building programs on  
459 neglected diseases. *PLoS Negl Trop Dis* 2009;3(8):e501. doi:  
460 10.1371/journal.pntd.0000501 [published Online First: 2009/08/19]
- 461 24. Excler JL, Kim JH. Novel prime-boost vaccine strategies against HIV-1. *Expert Rev*  
462 *Vaccines* 2019;18(8):765-79. doi: 10.1080/14760584.2019.1640117 [published Online  
463 First: 2019/07/05]
- 464 25. Hsu DC, O'Connell RJ. Progress in HIV vaccine development. *Hum Vaccin Immunother*  
465 2017;13(5):1018-30. doi: 10.1080/21645515.2016.1276138 [published Online First:  
466 2017/03/11]
- 467 26. Pitisuttithum P, Marovich MA. Prophylactic HIV vaccine: vaccine regimens in clinical  
468 trials and potential challenges. *Expert Rev Vaccines* 2020 doi:  
469 10.1080/14760584.2020.1718497 [published Online First: 2020/01/18]
- 470 27. Russell ND, Marovich MA. Pox-Protein Public Private Partnership program and  
471 upcoming HIV vaccine efficacy trials. *Curr Opin HIV AIDS* 2016;11(6):614-19. doi:  
472 10.1097/COH.0000000000000322 [published Online First: 2016/09/17]

- 473 28. Zhao LP, Fiore-Gartland A, Carpp LN, et al. Landscapes of binding antibody and T-cell  
474 responses to pox-protein HIV vaccines in Thais and South Africans. *PLoS One*  
475 2020;15(1):e0226803. doi: 10.1371/journal.pone.0226803 [published Online First:  
476 2020/01/31]
- 477 29. Karuna ST, Corey L. Broadly Neutralizing Antibodies for HIV Prevention. *Annu Rev*  
478 *Med* 2020;71:329-46. doi: 10.1146/annurev-med-110118-045506 [published Online  
479 First: 2020/01/28]
- 480 30. Hosseinipour MC, Innes C, Naidoo S, et al. Phase 1 HIV vaccine trial to evaluate the  
481 safety and immunogenicity of HIV subtype C DNA and MF59-adjuvanted subtype C Env  
482 protein. *Clin Infect Dis* 2020 doi: 10.1093/cid/ciz1239 [published Online First:  
483 2020/01/05]
- 484 31. Huang Y, DiazGranados C, Janes H, et al. Selection of HIV vaccine candidates for  
485 concurrent testing in an efficacy trial. *Curr Opin Virol* 2016;17:57-65. doi:  
486 10.1016/j.coviro.2016.01.007 [published Online First: 2016/02/02]
- 487 32. Bekker LG, Moodie Z, Grunenberg N, et al. Subtype C ALVAC-HIV and bivalent  
488 subtype C gp120/MF59 HIV-1 vaccine in low-risk, HIV-uninfected, South African adults: a  
489 phase 1/2 trial. *Lancet Hiv* 2018;5(7):e366-e78. doi: 10.1016/S2352-3018(18)30071-7  
490 [published Online First: 2018/06/15]
- 491 33. Jacobson JM, Zheng L, Wilson CC, et al. The Safety and Immunogenicity of an  
492 Interleukin-12-Enhanced Multiantigen DNA Vaccine Delivered by Electroporation for the  
493 Treatment of HIV-1 Infection. *J Acquir Immune Defic Syndr* 2016;71(2):163-71. doi:  
494 10.1097/QAI.0000000000000830 [published Online First: 2016/01/14]

495 34. Hutchins BI, Davis MT, Meseroll RA, et al. Predicting translational progress in  
496 biomedical research. *PLoS Biol* 2019;17(10):e3000416. doi:  
497 10.1371/journal.pbio.3000416 [published Online First: 2019/10/11]

498

499 **Figure legends**

500

501 **Fig 1. HVTN clinical trials.**

502 Number and phases of clinical trials conducted by the HVTN up until 2019.

503

504 **Fig 2. HVTN clinical trial sites.**

505 HIV prevalence among people ages 15-49 in 2017 and HVTN clinical trial sites around  
506 the world.

507

508 **Fig 3. HVTN productivity and impact.**

509 Number of research articles per year acknowledging support from the HVTN from 1999-  
510 2019.

511

512 **Fig 4. HIV vaccine coauthor networks.**

513 Each node represents one of the top 150 most prolific authors in the HIV vaccine field  
514 from either (A) 2000-2009 or (B) 2010-2019. Node size indicates the total number of  
515 publications per author. Edges connecting nodes indicate coauthorship. Edges  
516 connecting authors on HVTN publications are highlighted.



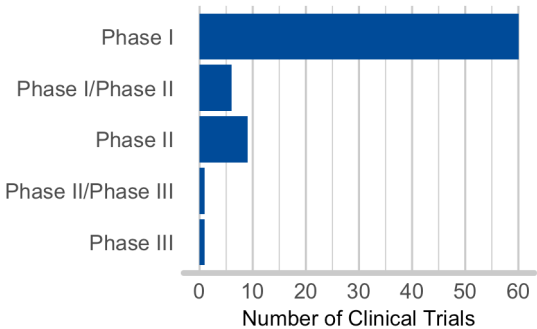

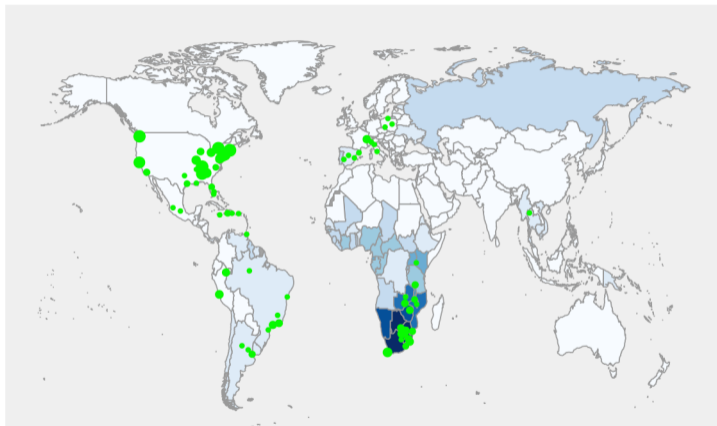

## HIV Prevalence

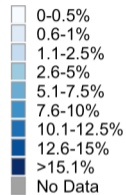

## Number of Trials

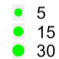

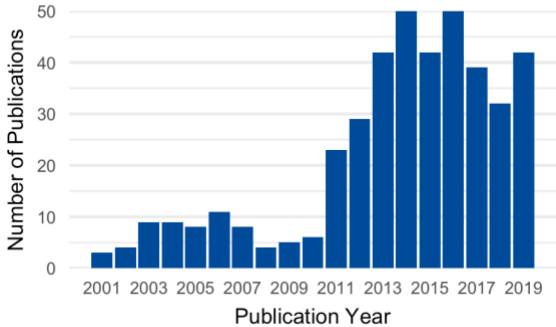

A.  
2000-2009

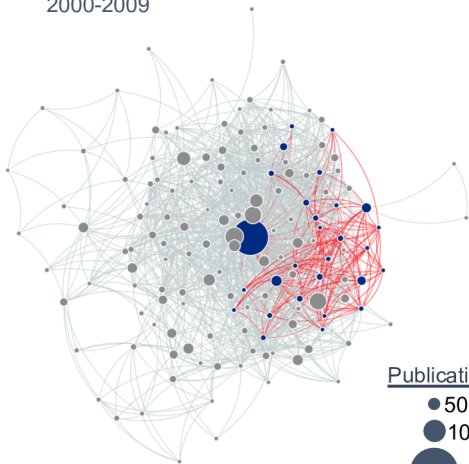

Node: ● HVTN ● Non-HVTN

B.  
2010-2019

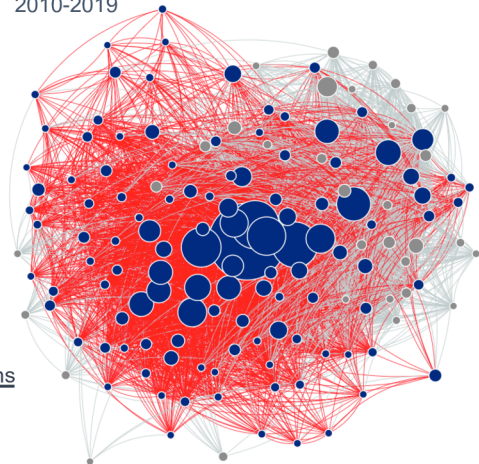

Edge: — HVTN — Other

Publications

● 50

● 100

● 200
